# Supplementary material for: Genomic Structure, Protein Character, Phylogenic Implication, and Embryonic Expression Pattern of a Zebrafish New Member of Zinc Finger BED-Type Gene Family
Source: MDPI journal article supplement (doi:10.3390/genes14010179), 2023-01-09
Supplement: s1 [file s1]

## Supplementary Figures

### PREDICTED: *Danio rerio* zgc:161969 (zgc:161969), transcript variant X1, protein coding

NCBI Reference Sequence: XM\_005168715.4

MERSRTAF **DHWMHKHYFTYRDTRGRNITVQC�LCLPKINILSTARDSTSNLKKHLECHS** PHLMRKHQHIEMSEP  
EPLFLPPKRLKSAVWEYFGYYKDPGGTIIADGRPVCRMCRRKVSARSNTSNMQHHLRDHHPMEFAKLNKHAV  
PCRKLREAAGIDGSSSFATNILENQTEESSEAKDDKNDSTIYYQTSQSRLNALVFNFIVEDVQPIISILEQPGF  
RKLIEALSRGKRVMSPNFVTRLEMAFDKMKTELKAKLSKVQTLCTTADIWSVQDRSYFGMTCHWLEDNLERRS  
AALACTRIPSNYTCETIIAKIQETHSSFNIESKVQATVTDNGNNFVKAFKEFSSDDEQEVEQSQFEDLGSILCD  
GDIGGDFFLSYFLPPHQRCAGQTLTTIASKDLAEAVTKGPAGKVRSSAAGKCAKIWHKAESSMETAVAMESIAN  
MKFTLPCLNQWSSEYYAINKMLTNDSQLNELTELLGVPHFTPDETSYLTEYTDVFKPVAFALDLLQGEEKCFL  
GIVIPTLLTLKRKLEEKAAANTRLFSAIEETVKAIDTRFKQVFESSDARLATVTTTPQFRLWWLPEEEREVLRAQ  
LITEVLQVDQGTETPEETNGGAVHEDEFFSYGPGSPGYKCGKREAAEEVWLYLQGTNKDLKCLNEFPGVKKVFIK  
FNTTLPSSAPVQQLFNSSGNNVNPKNPLTDEQFEHVLLRLYNSKIISALE

### *Danio rerio* zgc:161969 (zgc:161969), protein coding [\[in this study\]](#)

NCBI Reference Sequence: NM\_001083849.1

MERSRTAF **DHWMHKHYFTYRDTRGRNITVQC�LCLPKINILSTARDSTSNLKKHLERKHAVPCRKLREAAGID**  
**GSSSFATNILENQTEESSEAKDDKNDSTIYYQTSQSRLNALVFNFIVEDVQPIISILEQPGFR**KLIEALSRGKRV  
MSPNAFVTRLEMAFDKMKTELKAKLSKVQTLCTTADIWSVQDRSYFGMTCHWLEDNLERRSAAALACTRIPSNY  
CETIIAKIQETHSSFNIESKVQATVTDNGNNFVKAFKEFSSDDEQEVEQSQFEDLGSILCDGDIGGDFFLSYFL  
PPHQRCAGQTLTTIASKDLAEAVTKGPAGKVRSSAAGKCAKIWHKAESSMETAVAMESIANMKFTLPCLNQWS  
EYYAINKMLTNDSQLNELTELLGVPHFTPDETSYLTEYTDVFKPVAFALDLLQGEEKCFLGIVIPTLLTLKRK  
LEEKAAANTRLFSAIEETVKAIDTRFKQVFESSDARLATVTTTPQFRLWWLPEEEREVLRAQLITEVLQVDQGT  
EPETNGGAVHEDEFFSYGPGSPGYKCGKREAAEEVWLYLQGTNKDLKCLNEFPGVKKVFIKFNNTLPSSAPVQ  
LFNSGNNVNPKNPLTDEQFEHVLLRLYNSKIISTLE

### *Danio rerio* uncharacterized protein LOC569044 [\[in this study; the sequence same as NM\\_001083849.1 protein coding\]](#)

NCBI Reference Sequence: NP\_001077318.1

MERSRTAF **DHWMHKHYFTYRDTRGRNITVQC�LCLPKINILSTARDSTSNLKKHLERKHAVPCRKLREAAGID**  
**GSSSFATNILENQTEESSEAKDDKNDSTIYYQTSQSRLNALVFNFIVEDVQPIISILEQPGFR**KLIEALSRGKRV  
MSPNAFVTRLEMAFDKMKTELKAKLSKVQTLCTTADIWSVQDRSYFGMTCHWLEDNLERRSAAALACTRIPSNY  
CETIIAKIQETHSSFNIESKVQATVTDNGNNFVKAFKEFSSDDEQEVEQSQFEDLGSILCDGDIGGDFFLSYFL  
PPHQRCAGQTLTTIASKDLAEAVTKGPAGKVRSSAAGKCAKIWHKAESSMETAVAMESIANMKFTLPCLNQWS  
EYYAINKMLTNDSQLNELTELLGVPHFTPDETSYLTEYTDVFKPVAFALDLLQGEEKCFLGIVIPTLLTLKRK  
LEEKAAANTRLFSAIEETVKAIDTRFKQVFESSDARLATVTTTPQFRLWWLPEEEREVLRAQLITEVLQVDQGT  
EPETNGGAVHEDEFFSYGPGSPGYKCGKREAAEEVWLYLQGTNKDLKCLNEFPGVKKVFIKFNNTLPSSAPVQ  
LFNSGNNVNPKNPLTDEQFEHVLLRLYNSKIISTLE

**Figure S1. The deduced amino acid sequences of two potential transcripts and one uncharacterized protein LOC569044.** The two potential transcripts XM\_005168715 and NM\_001083849.1 were indicated by NCBI (upper and middle panels). The below panel showed the uncharacterized protein LOC569044, which is focused in this study. Yellow color indicated an essential ZBED domain, while green color indicated the XM\_005168715 transcript which lacks few amino acids compared with those of NM\_001083849.1 and uncharacterized protein LOC569044.

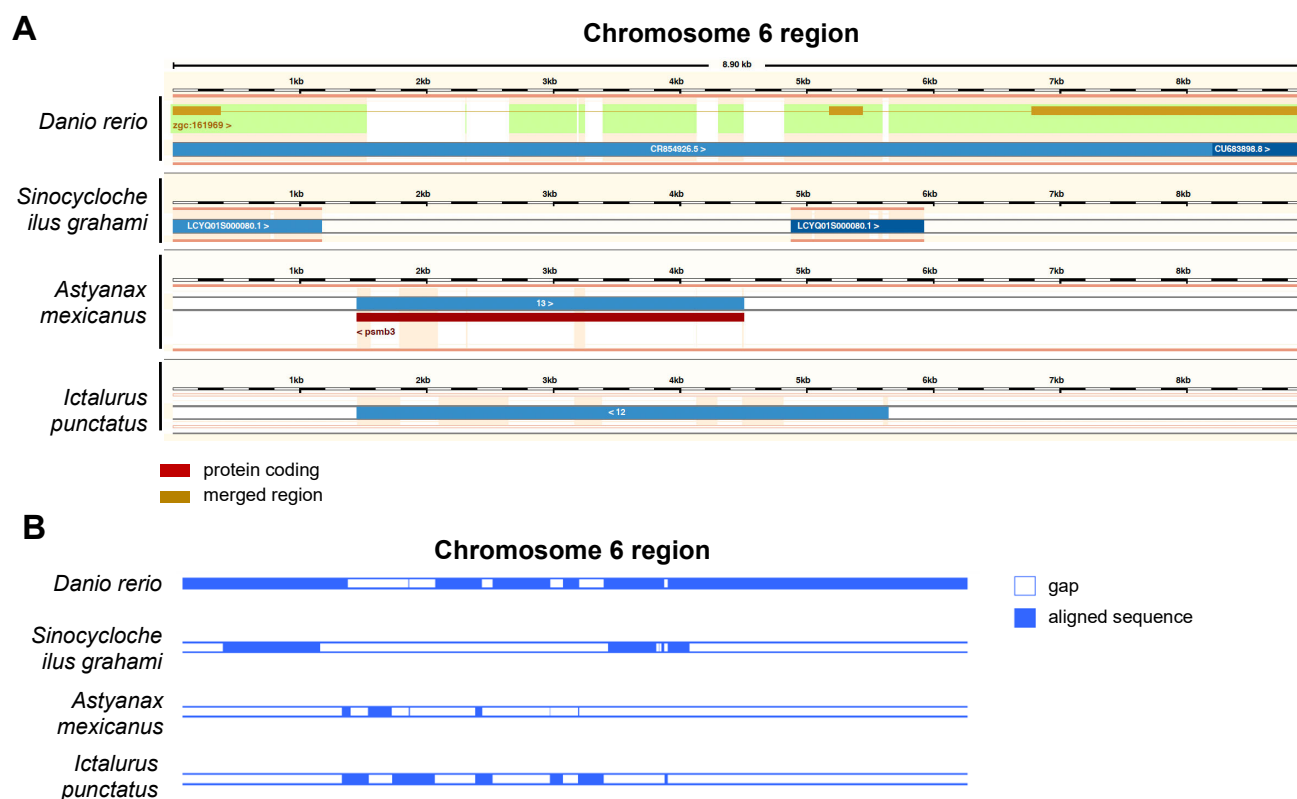

**Figure S2. Comparison of the gene maps encoding zebrafish LOC569044 protein and those of multiple bony fishes. (A)** *Sinocyclocheilus grahami*, *Astyanax mexicanus* and *Ictalurus punctatus* were found that they were similar alignment sequences located in chromosome 6 region compared to that of zebrafish *zgc:161969*. Horizontal lines indicated chromosome fragments, while dark brown color indicated protein encoded region in the genome. Aligned sequence were indicated in the light brown color and their positions were indicated above in kb. Synteny blocks in fragmented assembly defined by the *Ensembl*. **(B)** The schematic diagram showed the genomic alignments from panel A. The empty blue box indicated non-aligned sequence region, while the blue box indicated aligned sequence region in the genome. This model of synteny conservation is based on the *Ensembl*.
